# Supplementary material for: Effects of Muscle Type and Aging on Glycolysis and Physicochemical Quality Properties of Bactrian camel (Camelus bactrianus) Meat
Source: MDPI journal article supplement (doi:10.3390/ani14040611), 2024-02-14
Supplement: s1 [file s1]

## Supplementary Materials

**Table S1.** gDNA Eraser system.

| Reagent                      | Addition (μL) |
|------------------------------|---------------|
| RNase Free dH <sub>2</sub> O | 5.0           |
| 5×gDNA Eraser Buffer         | 2.0           |
| gDNA Eraser                  | 1.0           |
| Total RNA (500 ng/μL)        | 2.0           |
| Total                        | 10.0          |

**Table S2.** Reverse transcription system

| Reagent                                 | Addition (μL) |
|-----------------------------------------|---------------|
| RNA obtained from the previous reaction | 10.0          |
| RNase Free dH <sub>2</sub> O            | 4.0           |
| 5×PrimeScript Buffer 2 (for Real Time)  | 4.0           |
| RT Primer Mix                           | 1.0           |
| PrimeScript RT Enzyme MIX I             | 1.0           |
| Total                                   | 20.0          |

**Table S3.** qPCR system

| Reagent                                          | Addition (μL) |
|--------------------------------------------------|---------------|
| TB Green Premix Ex Taq II (Tli RNaseH Plus) (2×) | 12.5          |
| RNase Free dH <sub>2</sub> O                     | 8.5           |
| Primer F                                         | 1.0           |
| Primer R                                         | 1.0           |
| cDNA template (50 ng/ μL)                        | 2.0           |
| Total                                            | 25.0          |
